# Supplementary material
Source: PubMed Central journal article supplement (PMC2782099)
Supplement: emboj2009288s1.pdf [file emboj2009288s1.pdf]

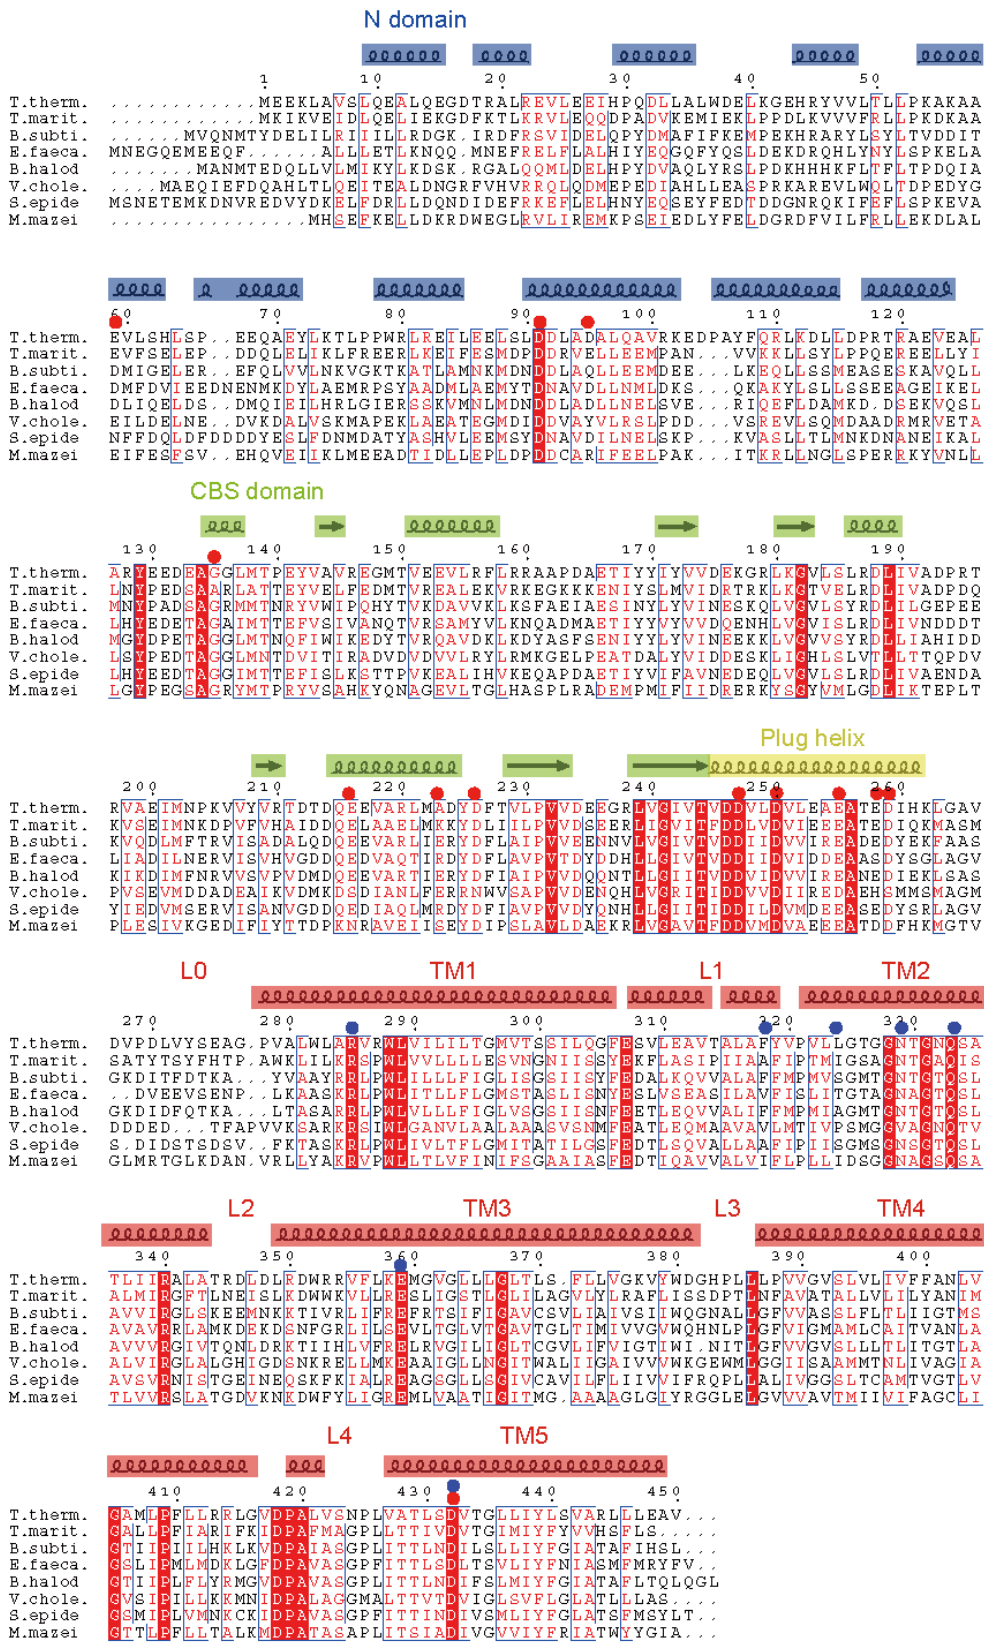

**Supplementary Figure S1**

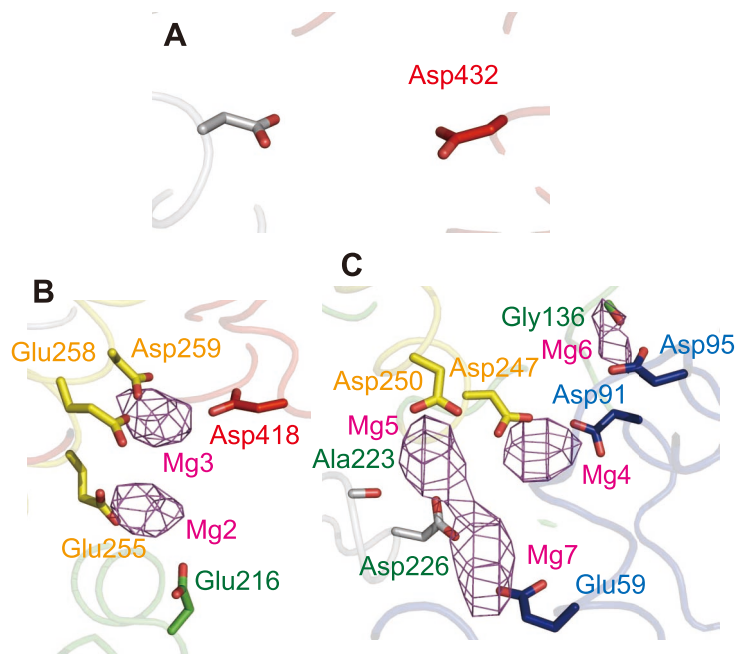

Supplementary Figure S2

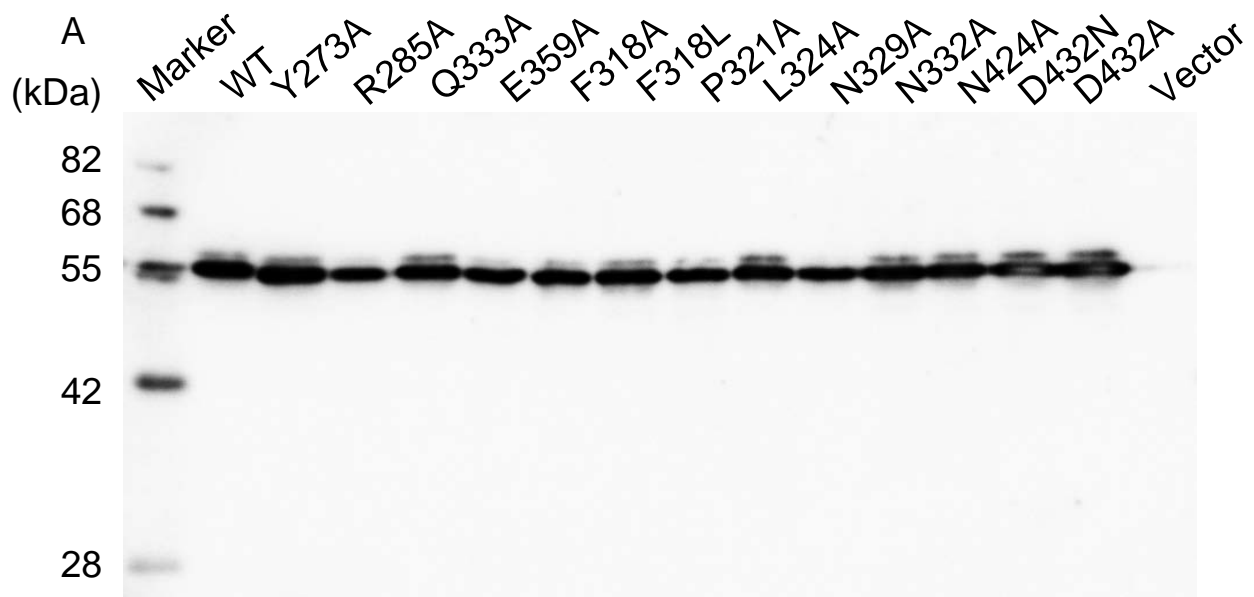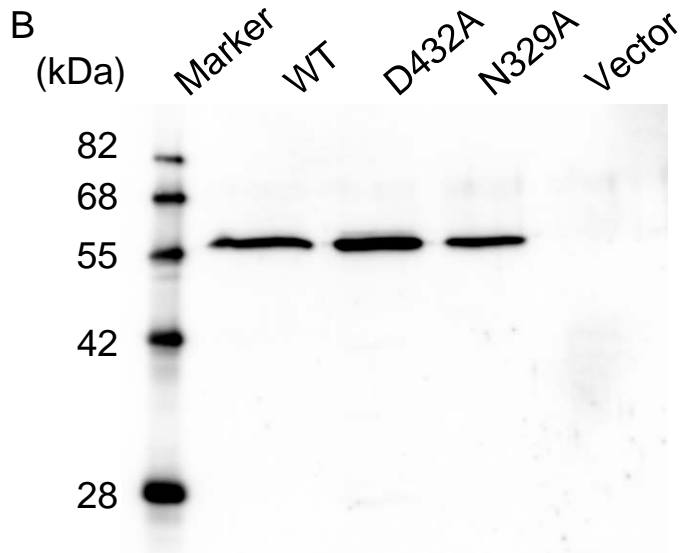

Supplementary Figure S3

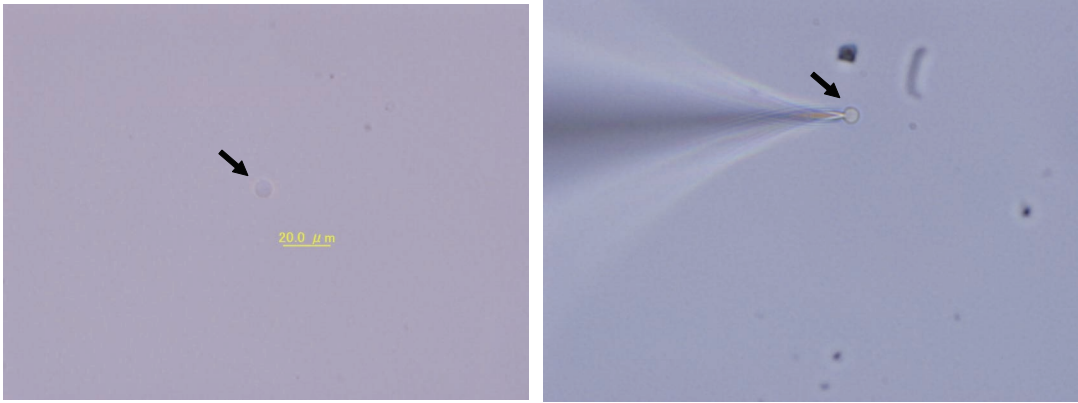

Supplementary Figure S4

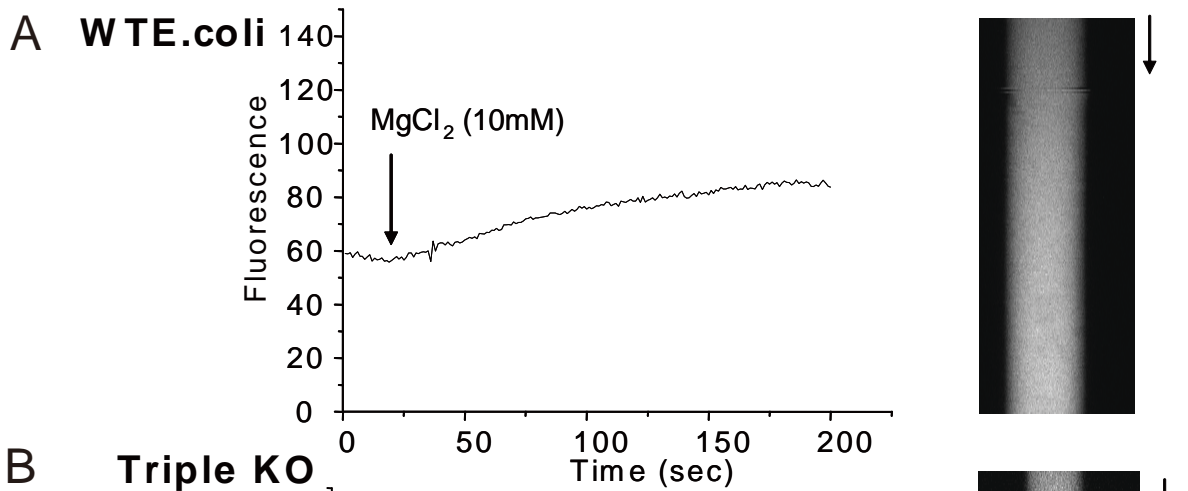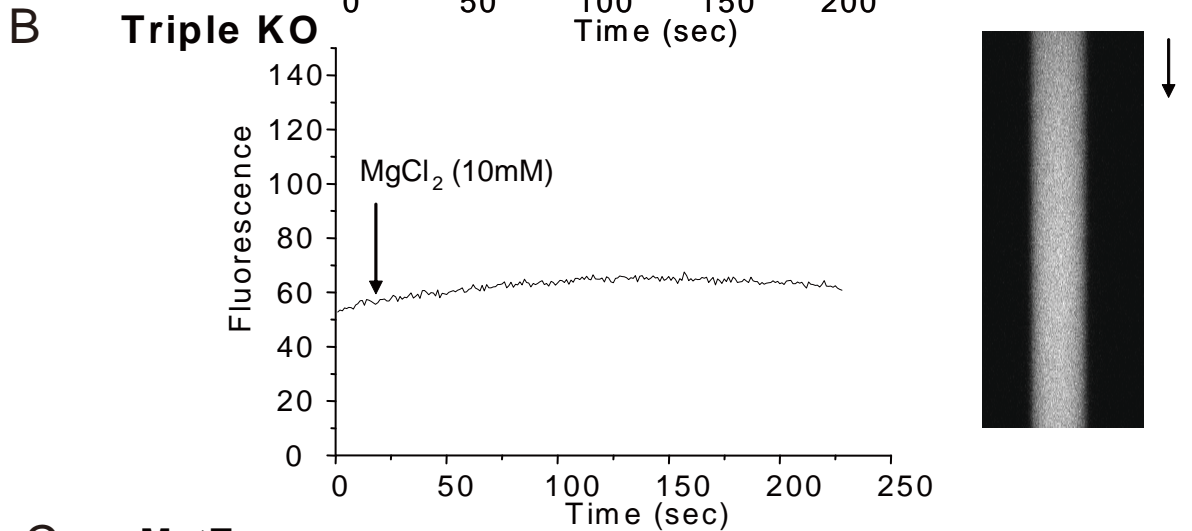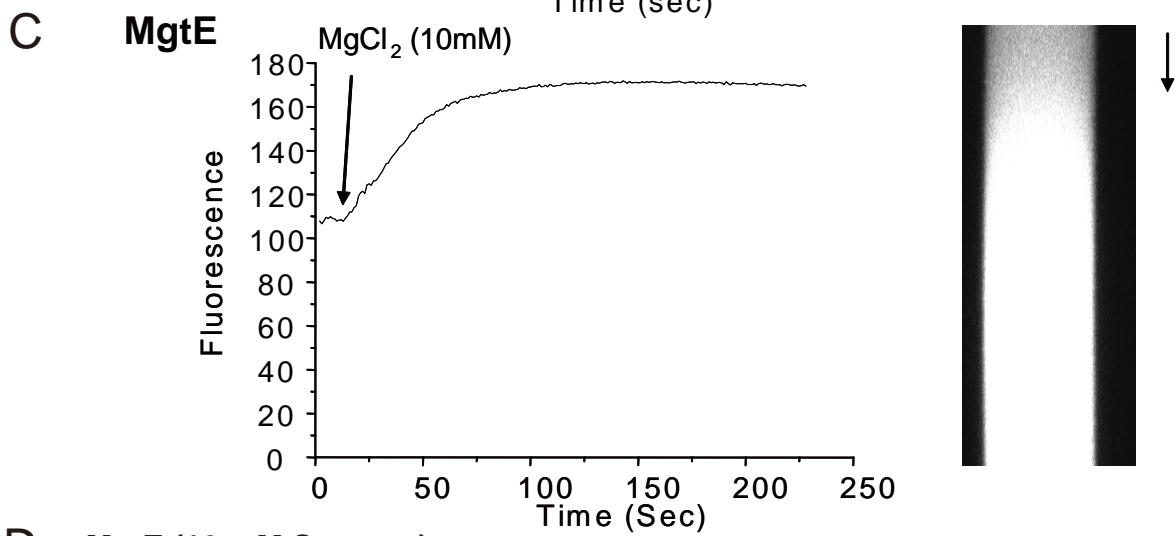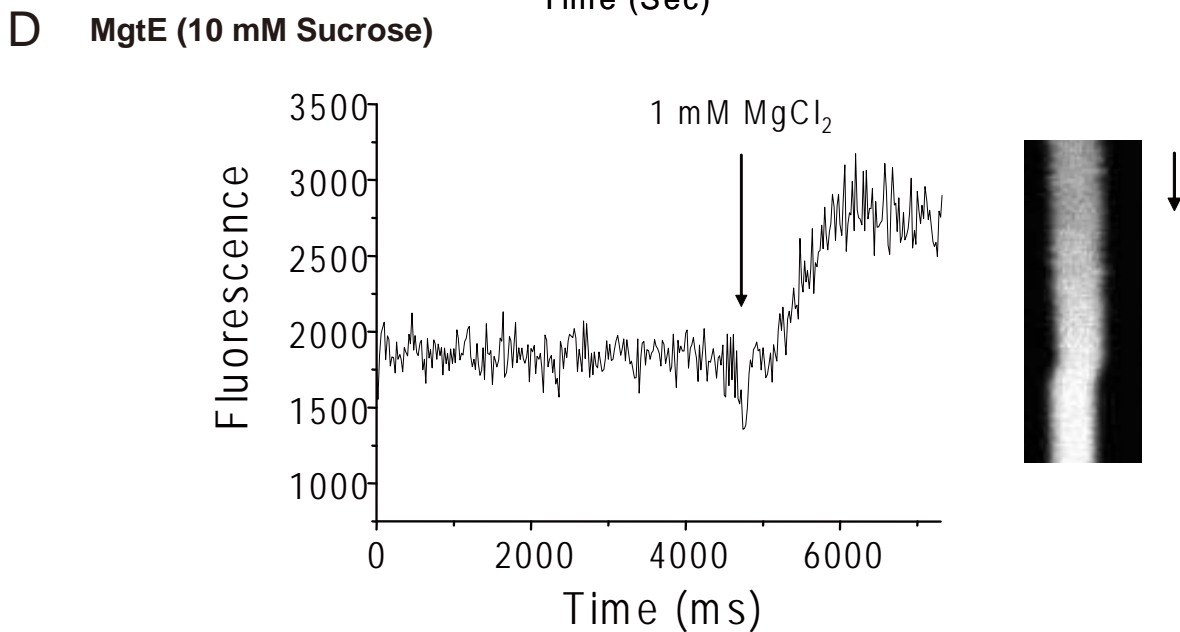

Supplementary Figure S5

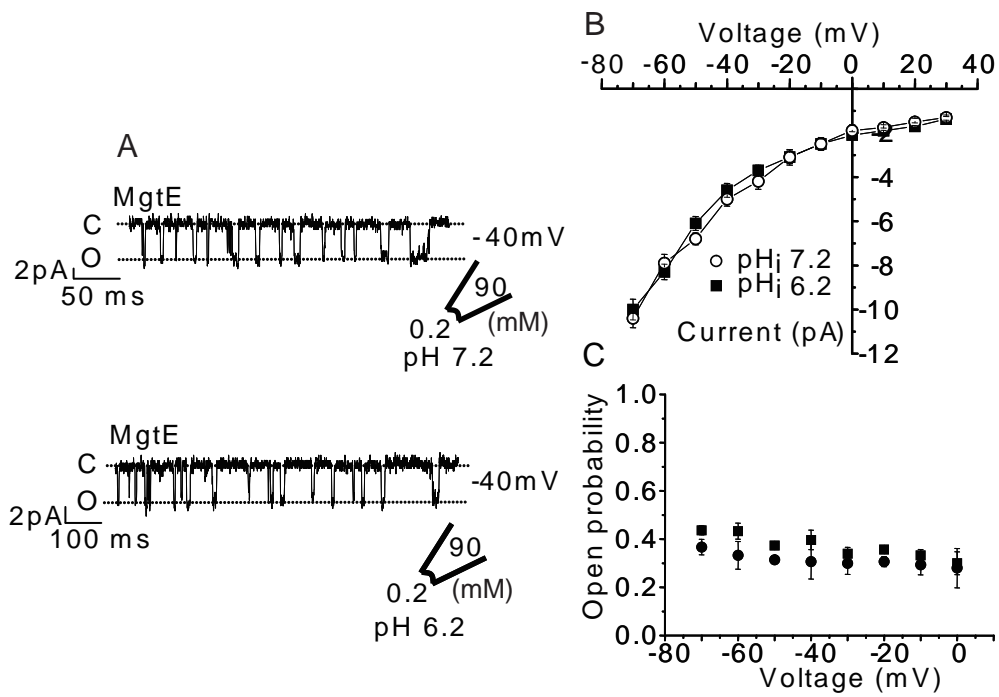

Supplementary Figure S6

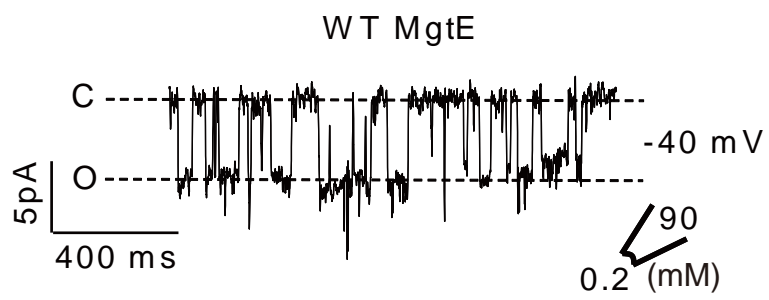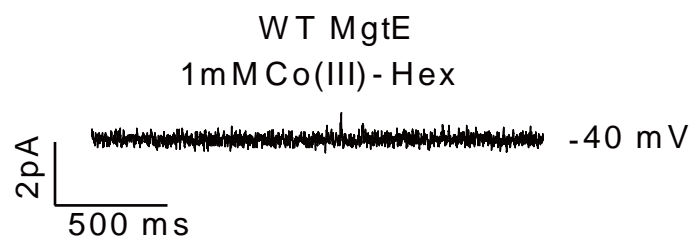

Supplementary Figure S7

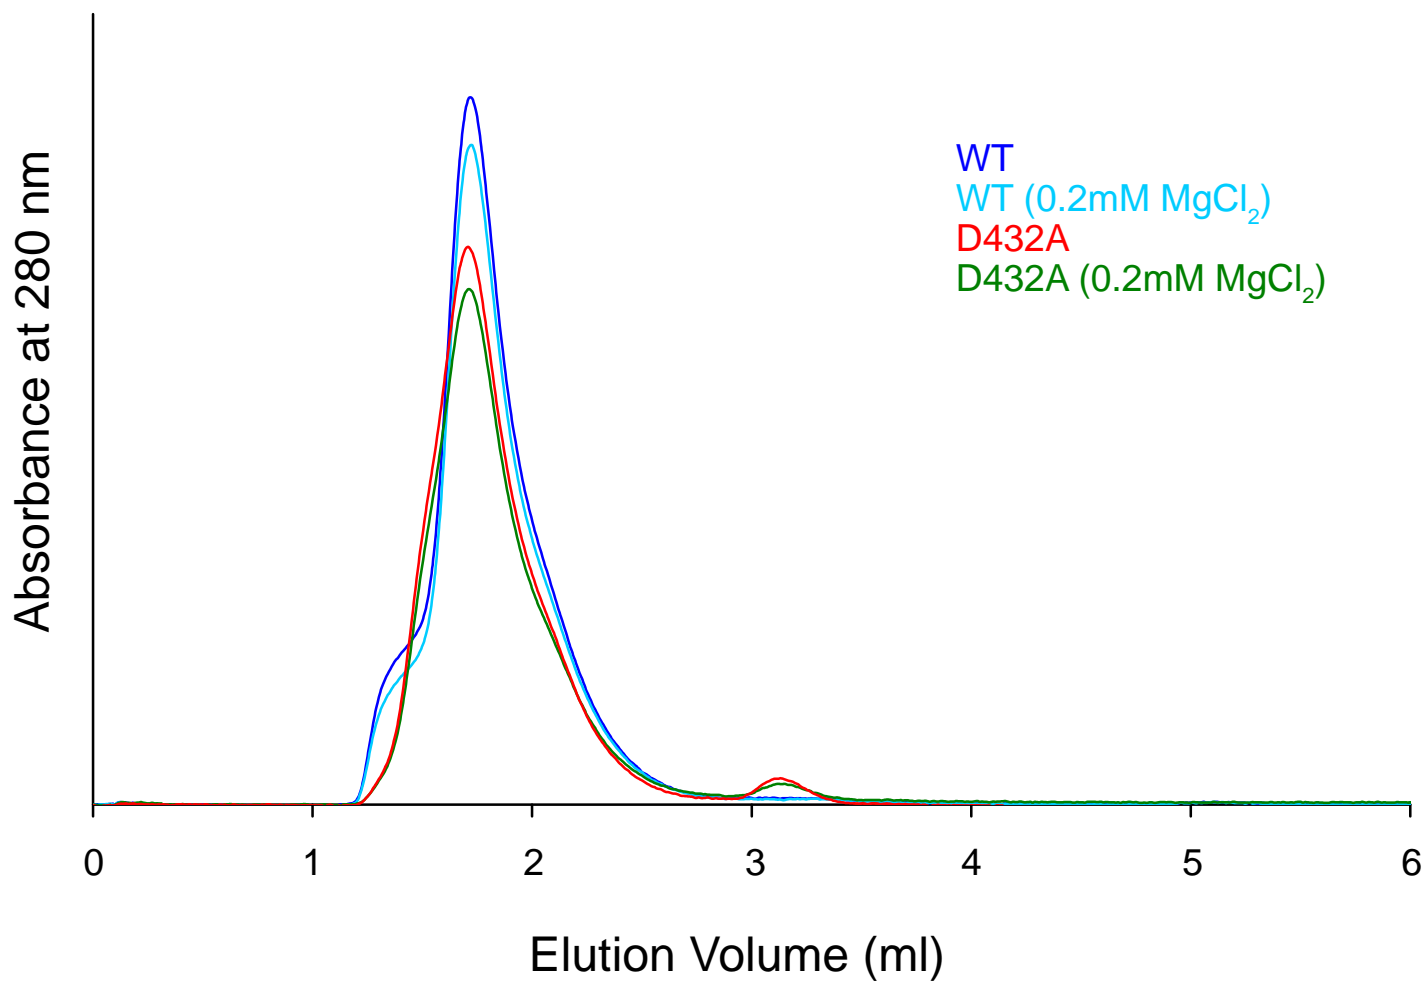

Supplementary Figure S8



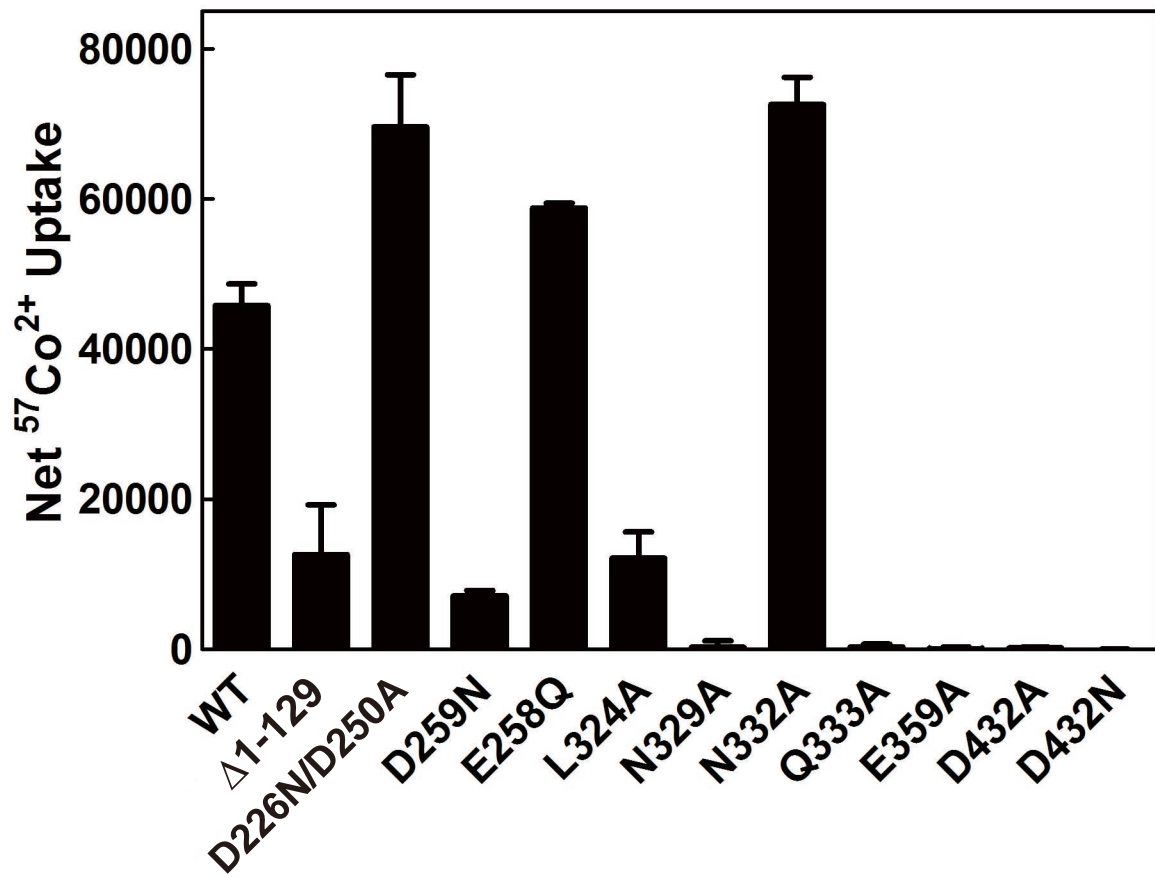

Supplementary Figure S9

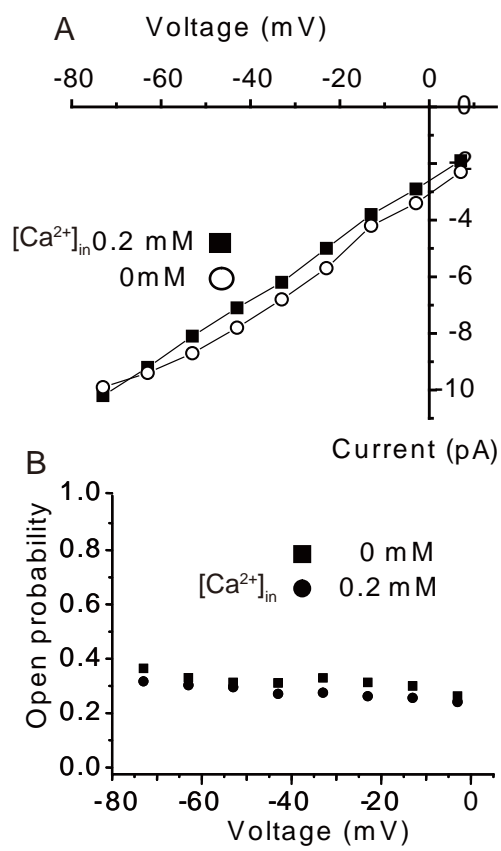

**Supplementary Figure S10**

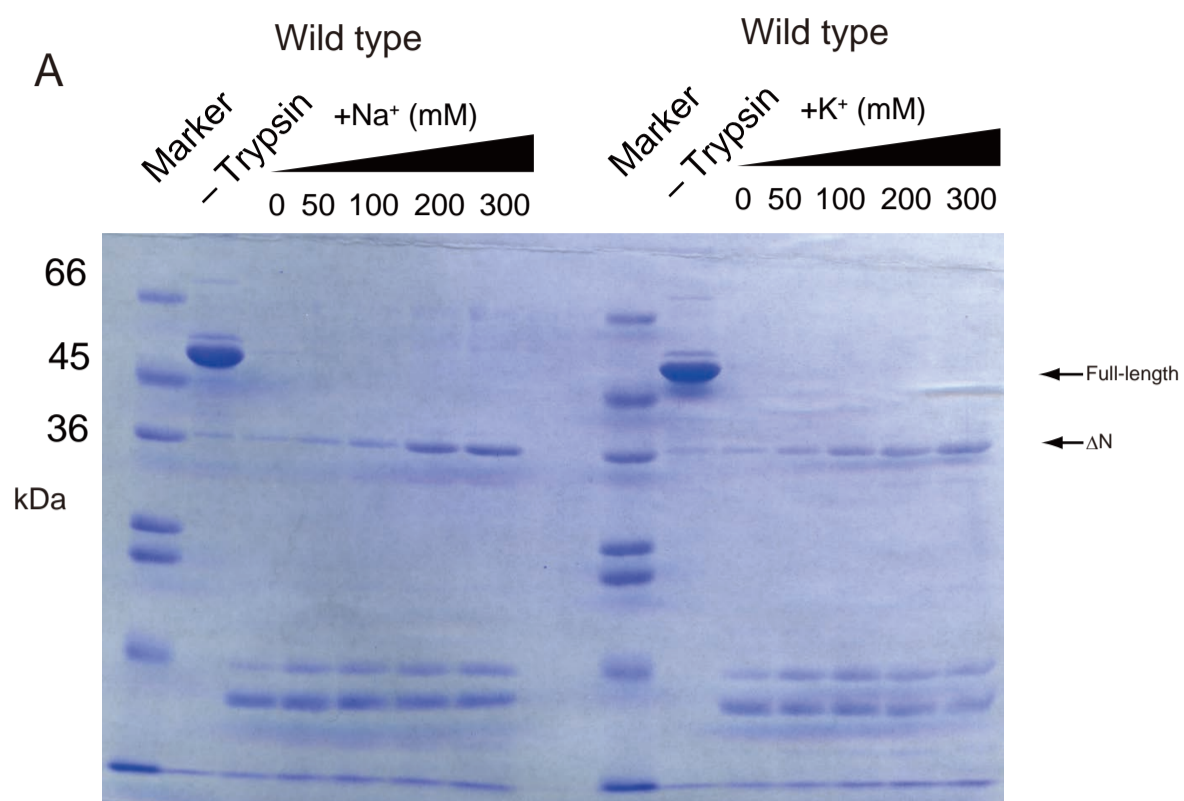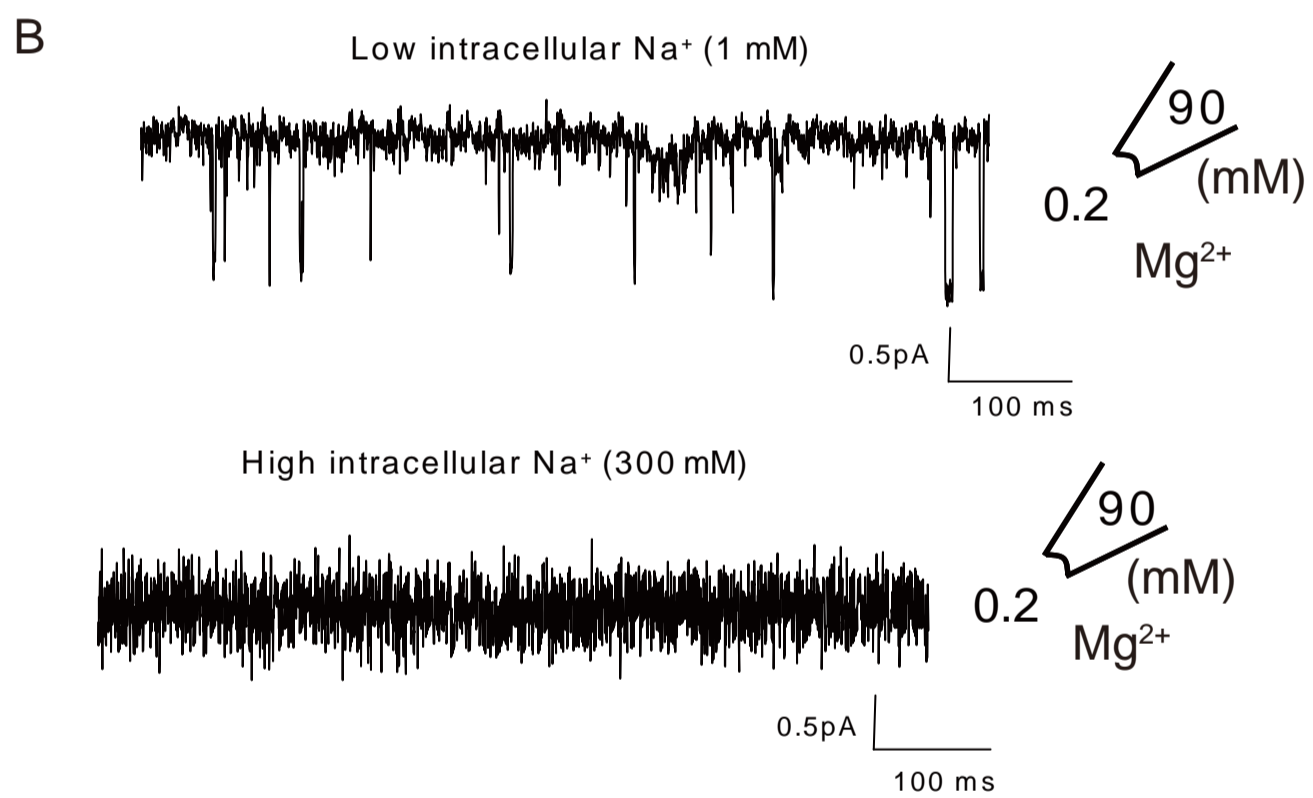

**Supplementary Figure S11**

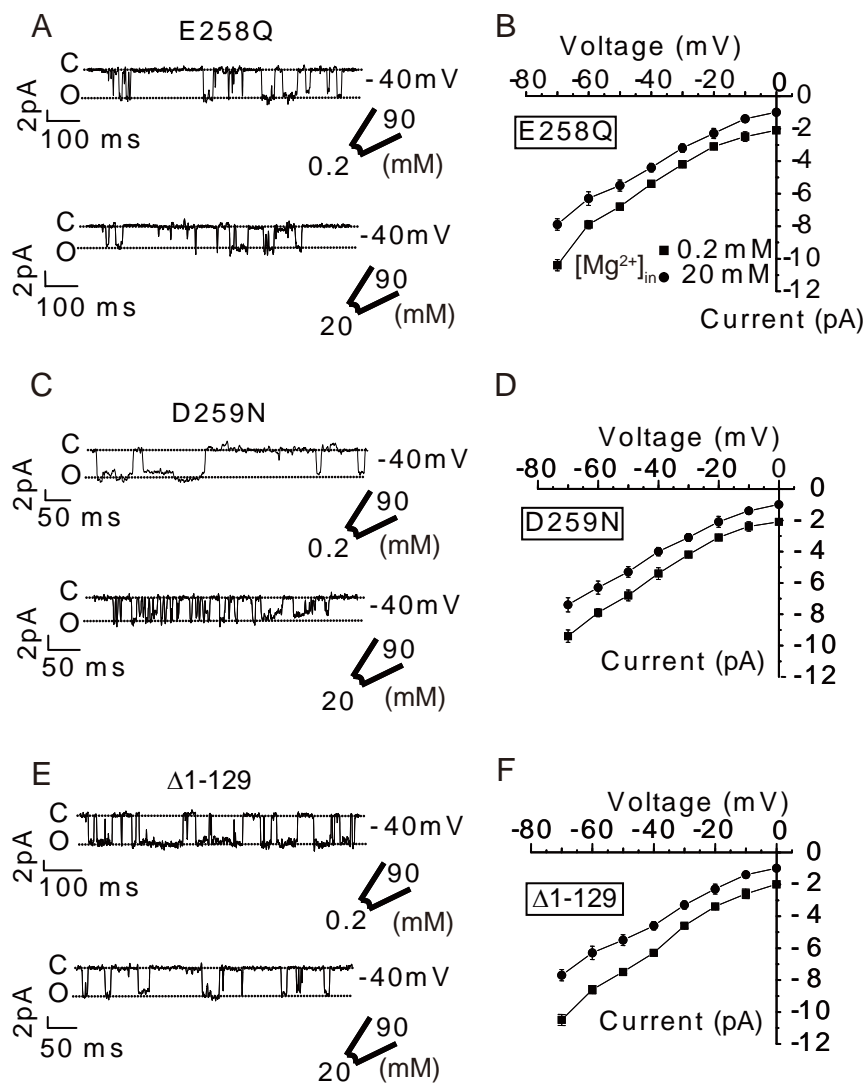

**Supplementary Figure S12**

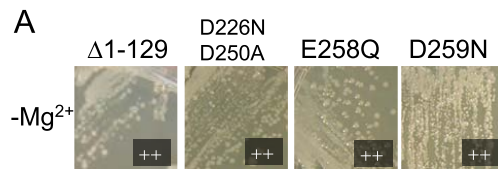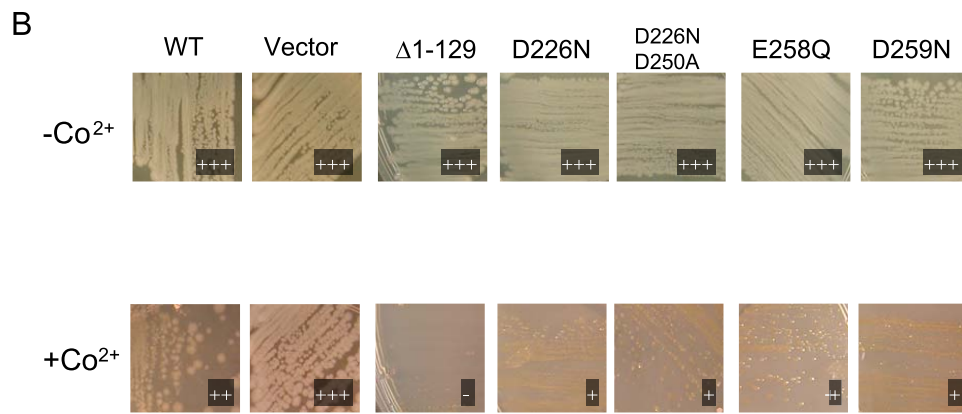

**Supplementary Figure S13**

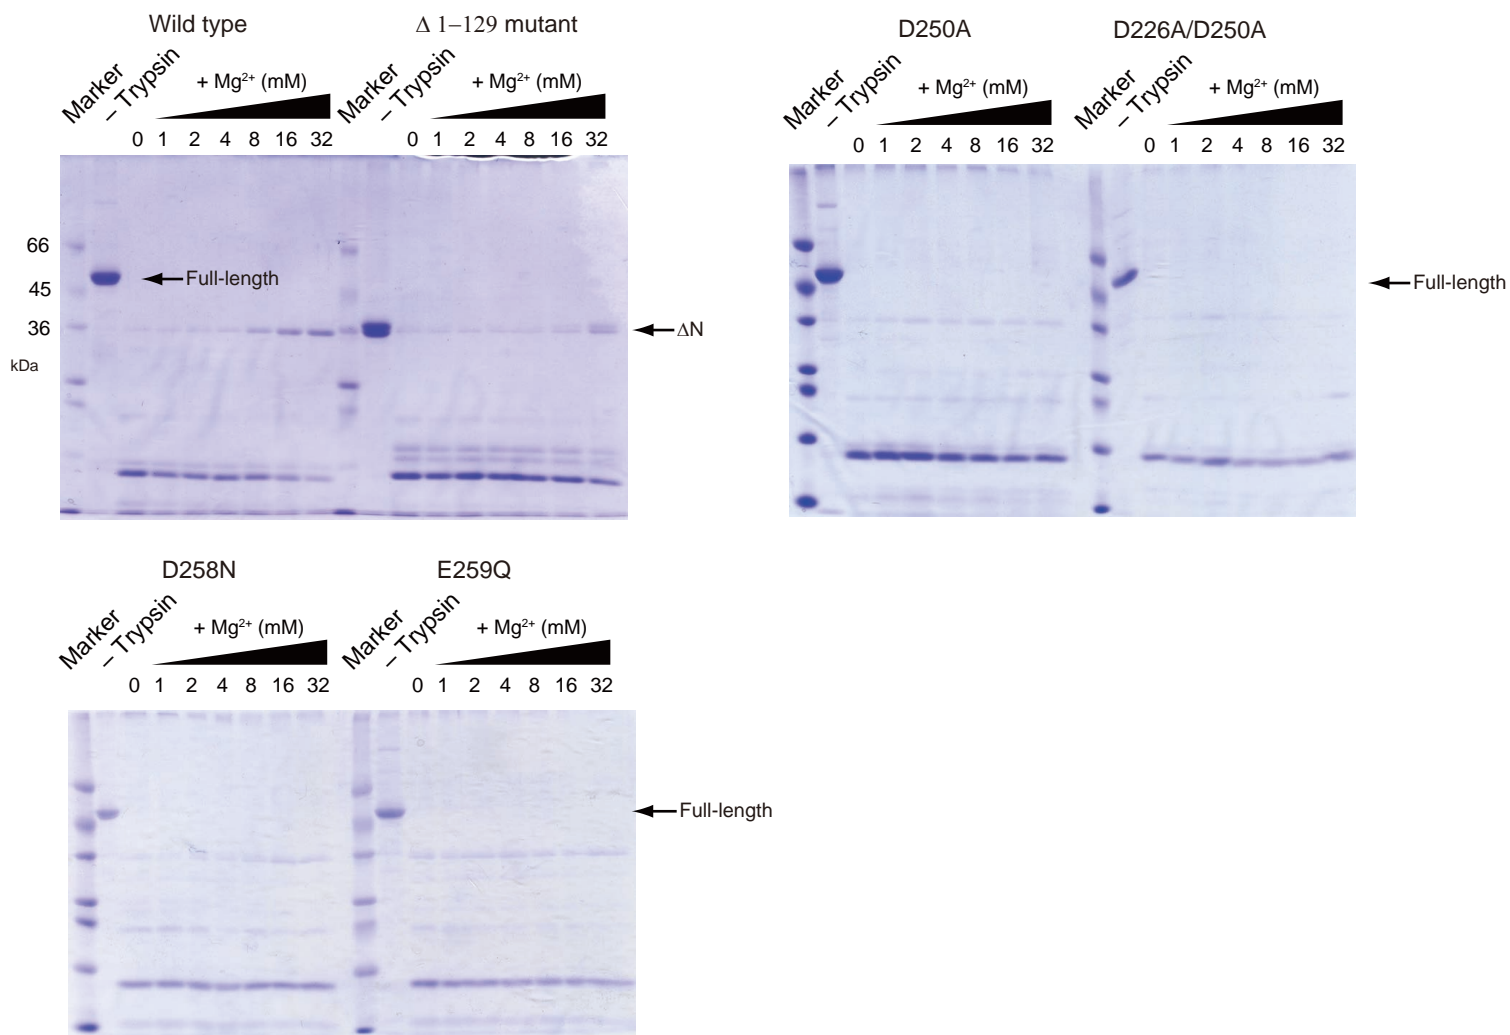

Supplementary Figure S14

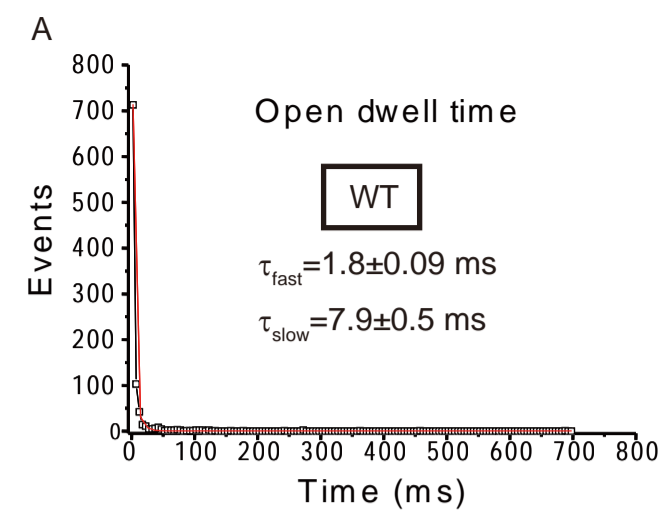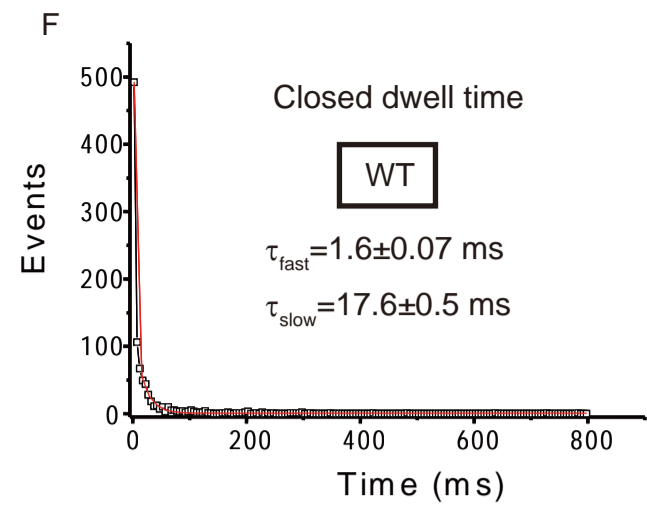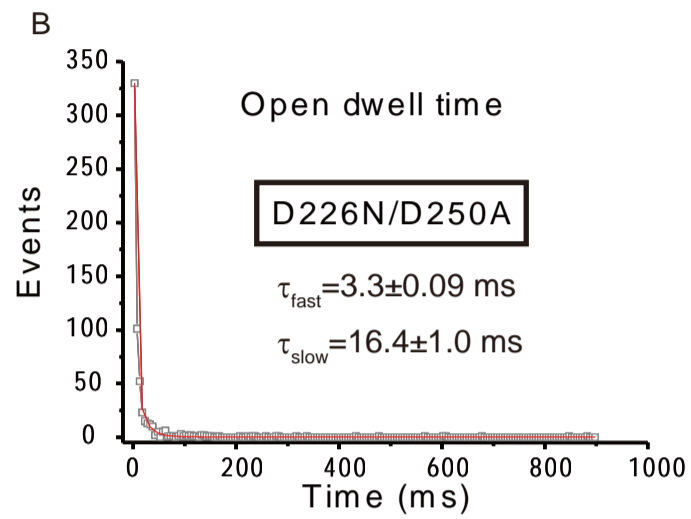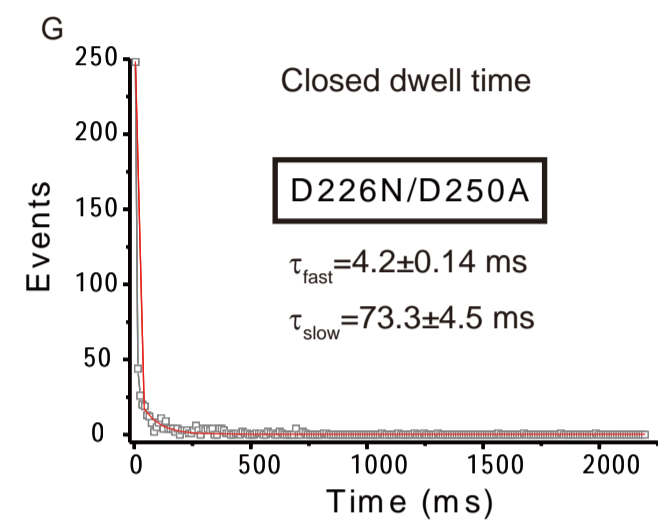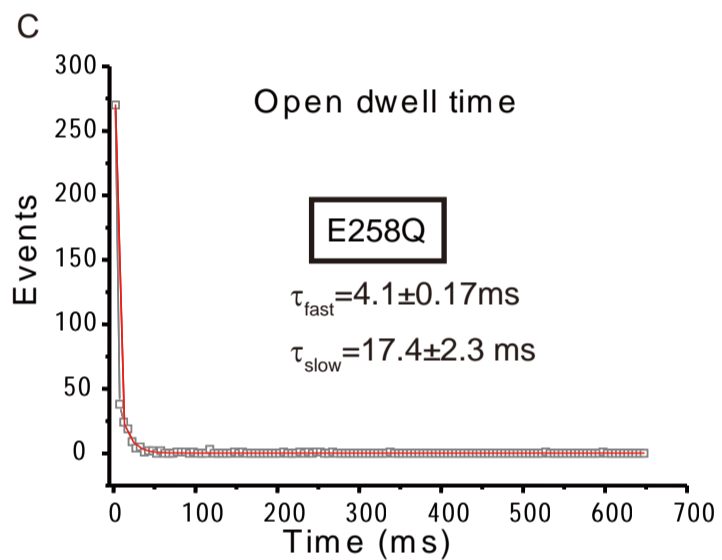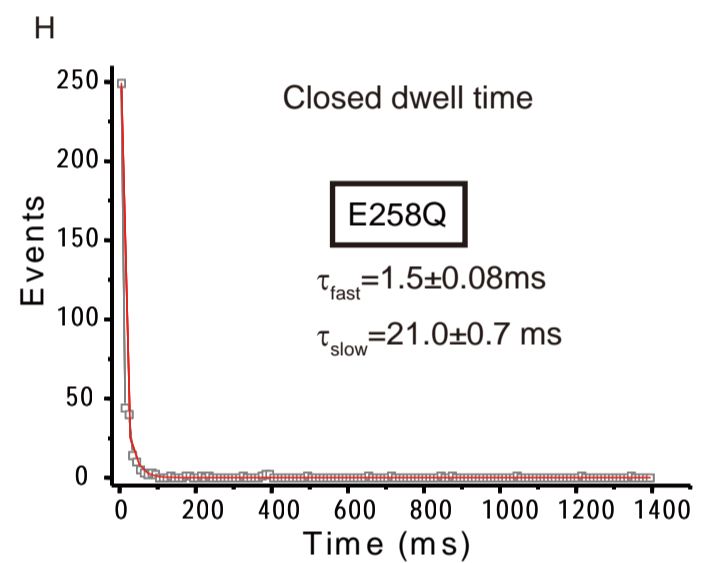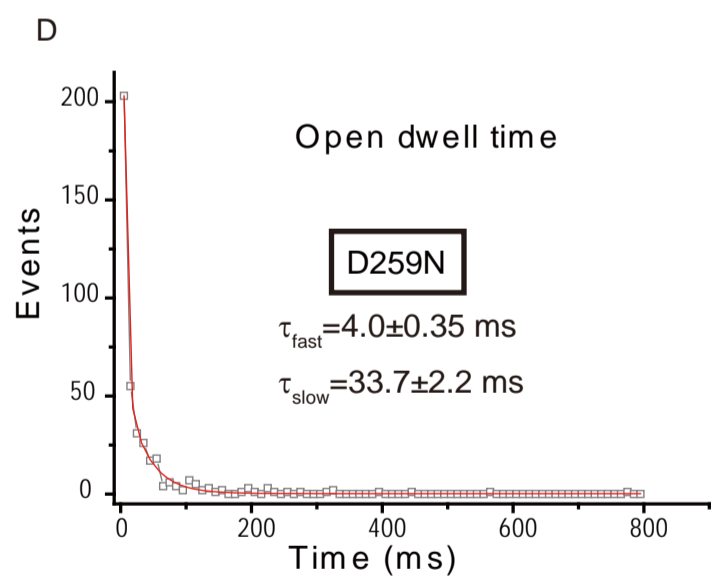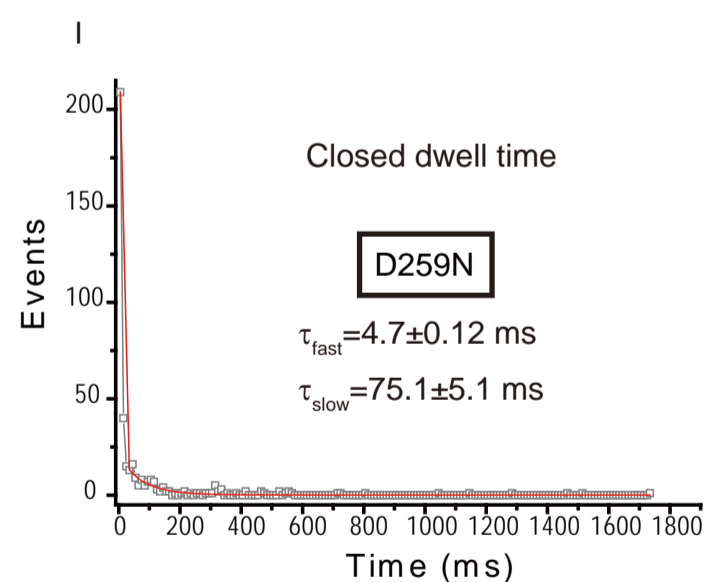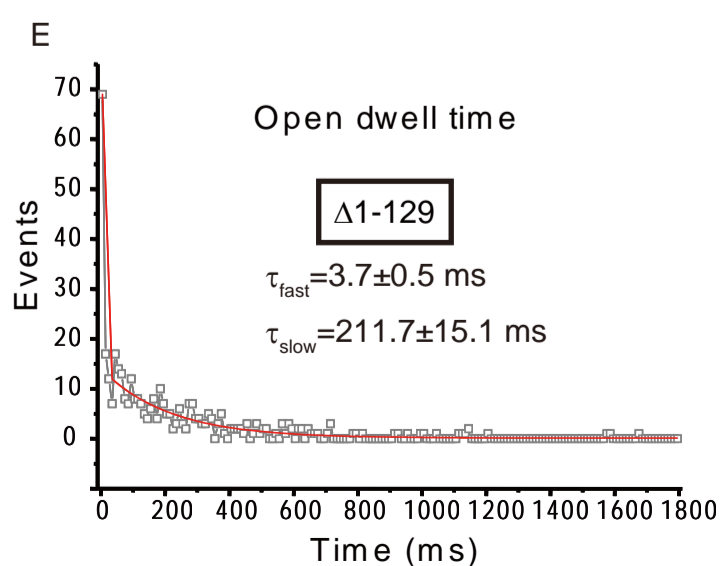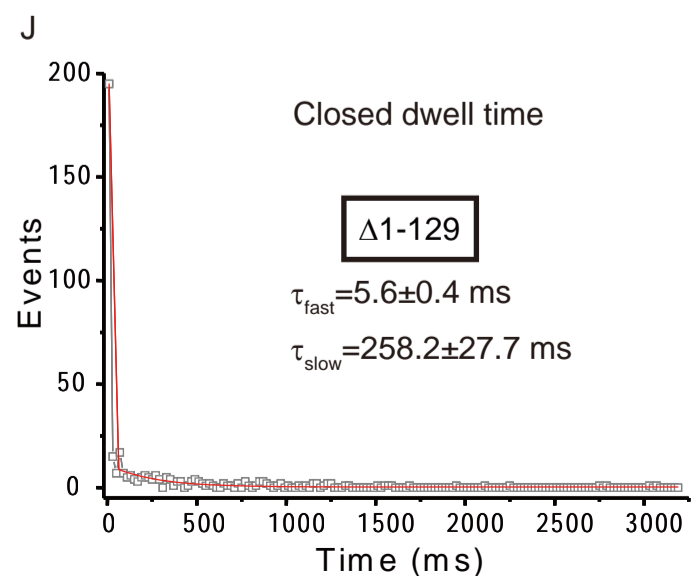

Supplementary Figure S15

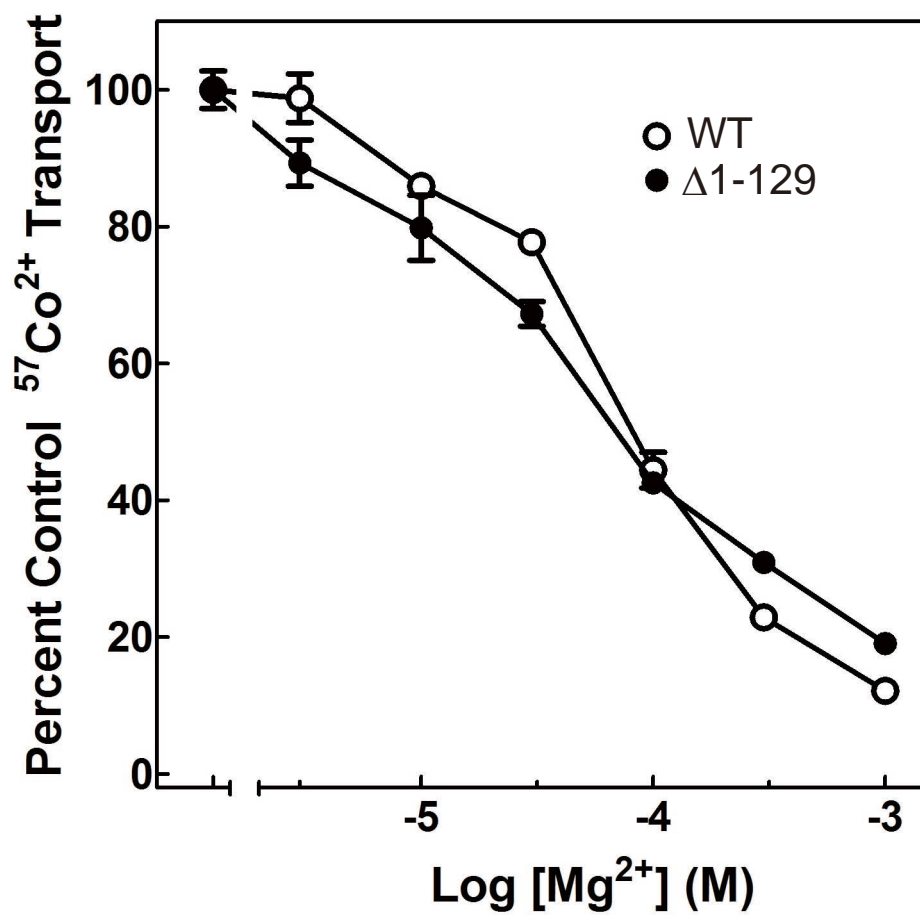

Supplementary Figure S16



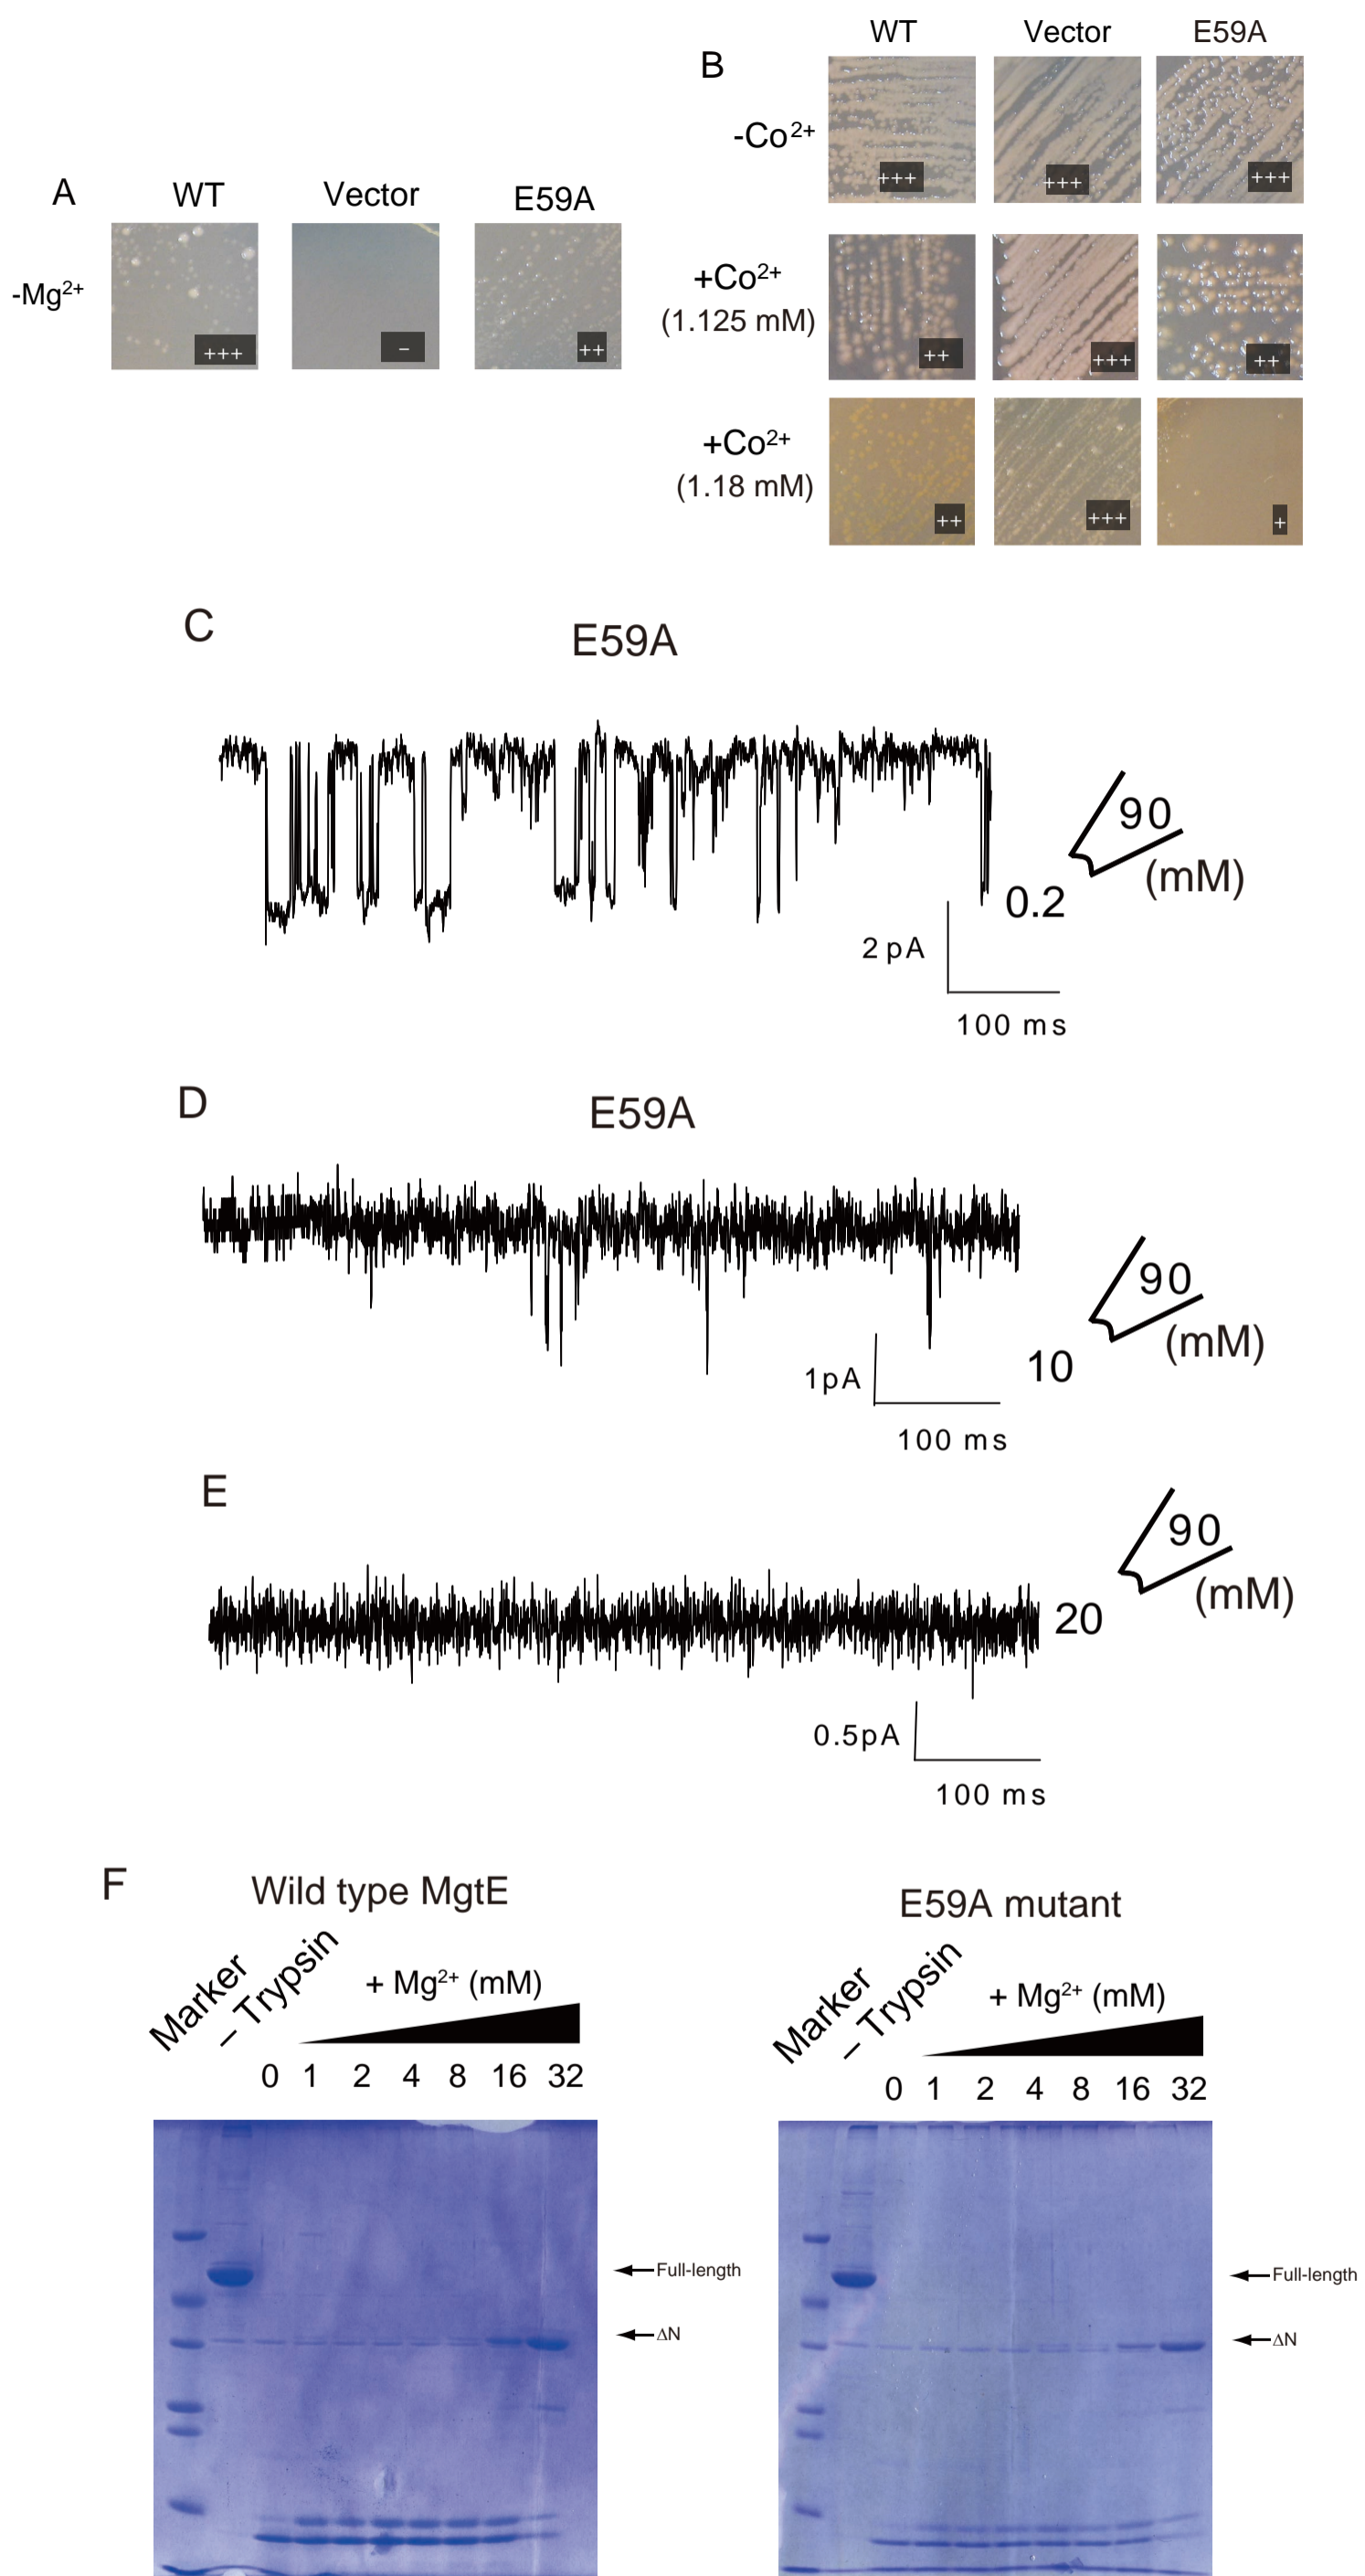

Supplementary Figure S17
